1 **Title:**

2 Rest is Required to Learn an Appetitively-Reinforced Operant Task in *Drosophila*

3

4 **Abbreviated Title:**

5 Operant Conditioning of Food Reward Requires Rest

6

7 **Author Names:**

8 Timothy D. Wiggin 1

9 Yung-Yi Hsiao 1#

10 Jeffrey B. Liu 1#

11 Robert Huber 2,3

12 Leslie C. Griffith 1\*

13

14 1. Department of Biology, National Center for Behavioral Genomics and Volen Center  
15 for Complex Systems, Brandeis University, MA 02454

16 2. Radcliffe Institute for Advanced Studies, Harvard University, MA 02138

17 3. Juvatech, Toledo, OH 43615

18

19 # These authors contributed equally

20

21 **\*Corresponding author:**

22 Leslie C. Griffith

23 Brandeis University

24 Department of Biology MS008

25 415 South Street

26 Waltham, MA, 02454-9110, USA

27 Tel: 781 736 3125

28 Fax: 781 736 3107

29 [griffith@brandeis.edu](mailto:griffith@brandeis.edu)

30

31 **Conflict of Interest:**

32 The authors declare no competing financial interests.

33

34 **Acknowledgements:**

35 This work was supported by National Institutes of Health Grants R01 MH067284 (to  
36 LCG), F32 NS098624 (to TDW), R90 DA033463 (to JBL), the Radcliffe Institute for  
37 Advanced Studies Fellowship (to RH), the Brandeis Provost Research Grant (to TDW),  
38 and the M. R. Bauer Foundation Summer Undergraduate Research Fellowship (to  
39 YYH). We would also like to thank Hazal Uzunkaya and the Brandeis MakerLab for 3D  
40 printing assistance.

41 **ABSTRACT**

42 Maladaptive operant conditioning contributes to development of neuropsychiatric  
43 disorders. Candidate genes have been identified that contribute to this maladaptive  
44 plasticity, but the neural basis of operant conditioning in genetic model organisms  
45 remains poorly understood. The fruit fly *Drosophila melanogaster* is a versatile genetic  
46 model organism that readily forms operant associations with punishment stimuli.  
47 However, operant conditioning with a food reward has not been demonstrated in flies,  
48 limiting the types of neural circuits that can be studied. Here we present the first  
49 sucrose-reinforced operant conditioning paradigm for flies. Flies of both sexes walk  
50 along a Y-shaped track with reward locations at the terminus of each hallway. When  
51 flies turn in the reinforced direction at the center of the track, sucrose is presented at the  
52 end of the hallway. Only flies that rest during training show evidence of learning the  
53 reward contingency. Flies rewarded independently of their behavior do not form a  
54 learned association but have the same amount of rest as trained flies, showing that rest  
55 is not driven by learning. Optogenetically-induced rest does not promote learning,  
56 indicating that rest is not sufficient for learning the operant task. We validated the  
57 sensitivity of this assay to detect the effect of genetic manipulations by testing the  
58 classic learning mutant *dunce*. *Dunce* flies are learning impaired in the Y-Track task,  
59 indicating a likely role for cAMP in the operant coincidence detector. This novel training  
60 paradigm will provide valuable insight into the molecular mechanisms of disease and  
61 the link between sleep and learning.

62 **SIGNIFICANCE STATEMENT**

63 Operant conditioning and mental health are deeply intertwined: maladaptive  
64 conditioning contributes to many pathologies, while therapeutic operant conditioning is a  
65 frequently used tool in talk therapy. Unlike drug interventions which target molecules or  
66 mechanisms, it is not known how operant conditioning changes the brain to promote  
67 wellness or distress. To gain mechanistic insight into how this form of learning works,  
68 we developed a novel operant training task for the fruit fly *Drosophila melanogaster*. We  
69 made three key discoveries. First, flies are able to learn an operant task to find food  
70 reward. Second, rest during training is necessary for learning. Third, the *dunce* gene is  
71 necessary for both classical and operant conditioning in flies, indicating that they may  
72 share molecular mechanisms.

## 73 INTRODUCTION

74 Learning is a broadly conserved, highly regulated, and health relevant function of  
75 the nervous system. Learning updates the frequency of behaviors to reflect stimulus  
76 predictability in an animal's environment. The associative forms of learning transfer the  
77 value of an innately valued stimulus (an unconditioned stimulus or US) to an associated  
78 predictor, either a behavior or cue (Fanselow and Wassum, 2015). US association with  
79 internally-generated behavior (e.g. locomotion, static posture, lever press) produces  
80 "operant conditioning" across a wide range of animal species (Skinner, 1948; Kimble et  
81 al., 1955; Susswein et al., 1986). Operant conditioning allows the animal to modify its  
82 behavior to increase the likelihood of obtaining rewarding stimuli and decrease the  
83 likelihood of encountering aversive stimuli.

84 Operant conditioning to reward or relief from punishment incorporates a positive  
85 feedback loop – learning increases the generation of the behavior, which in turn  
86 increases reward frequency, which strengthens the learned association. This type of  
87 positive feedback loop is hypothesized to contribute to diverse neuropsychiatric  
88 disorders including childhood anxiety, compulsive behaviors, and chronic pain  
89 (Ollendick et al., 2001; Korff and Harvey, 2006; Chóliz, 2010; Gatzounis et al., 2012).  
90 Genome-wide association studies have identified candidate genes that increase  
91 susceptibility to these operant conditioning-associated disorders (Smith et al., 2016;  
92 Levey et al., 2020; Smit et al., 2020). However, despite the relevance to human health,  
93 the neural basis of operant conditioning in genetic model organisms remains  
94 incompletely understood. It is not currently possible to trace a neural circuit of operant  
95 conditioning in animals more complex than *Aplysia californica* (Nargeot and Simmers,

96 2011), nor has there been a genetic screen for molecular components of operant  
97 learning in model organisms. A promising system to address this gap in knowledge is  
98 the fruit fly *Drosophila melanogaster*. Much of the known molecular machinery  
99 underlying learning and memory was first discovered using genetics in the fly and these  
100 molecules have subsequently been shown to be essentially identical in humans  
101 (Greenspan and Dierick, 2004). Furthermore, a draft map of the neural connections in a  
102 fruit fly hemi-brain has been recently published which, along with advanced genetic  
103 tools, greatly facilitates mapping complex neural circuits (Pfeiffer et al., 2010; Xu et al.,  
104 2020).

105 Operant conditioning has been studied extensively in flies, but only limited  
106 progress has been made in understanding circuit-level mechanisms. There have been  
107 many operant conditioning paradigms reported in flies: geotaxis training (Murphey,  
108 1967), leg position conditioning (Booker and Quinn, 1981), proboscis extension  
109 suppression (DeJianne et al., 1985), flight simulator heat avoidance (Wolf and  
110 Heisenberg, 1991), conditioned place preference (Wustmann et al., 1996), social  
111 freezing (Kamyshev et al., 1997), and left-right navigation in tethered ball-walking  
112 (Nuwal et al., 2012). However, a pair of landmark publications (Brembs and Plendl,  
113 2008; Brembs, 2009) demonstrated that when predictive sensory cues are available,  
114 flies preferentially learn these sensory cues and block the formation of operant  
115 conditioning. This finding dramatically compromises a number of paradigms that claim  
116 to test operant learning in flies, since sensory information present during training may  
117 have inhibited operant learning. The remaining purely operant learning paradigms that  
118 are routinely used in flies, flight simulator heat avoidance and proboscis extension

119 suppression, have two important limitations. First, they use restrained fly preparations,  
120 which unavoidably alter animal behavior (Stowers et al., 2017). Second, they use an  
121 aversive US which may not recruit the full repertoire of US pathway neurons (Liu et al.,  
122 2012) and may use neurons outside the brain for learning (Booker and Quinn, 1981).

123 In order to extend the range of operant conditioning paradigms in flies, we  
124 developed a positively reinforced, self-paced, operant training task for untethered flies,  
125 which we call the Y-Track. Surprisingly, we found that this operant training paradigm  
126 only produces a change in behavioral frequency in the subset of experimental animals  
127 that rest during training. This surprising finding further reinforces the importance of rest  
128 for learning (Maquet, 2001) and opens a new avenue for measuring this link in a single-  
129 session paradigm.

130

## 131 **MATERIALS AND METHODS**

### 132 *Experimental Animals*

133 Flies were raised on cornmeal-dextrose-yeast food in bottles at room  
134 temperature or in a 25 C incubator with a 12 hour:12 hour light:dark cycle. Wild type  
135 flies were from the Canton-Special (CS) background. Transgenic flies were obtained  
136 from the Bloomington Drosophila Stock Center (BDSC) and Vienna Drosophila  
137 Resource Center (VRDC) as follows:  $P\{VT058968-GAL4\}attP2$  (VT058968-GAL4,  
138 VDRC# 204550),  $P\{w[+mW.hs]=GawB\}104y$  (104y-Gal4, BDSC# 81014),  
139  $PBac\{y[+mDint2] w[+mC]=UAS-ChR2.XXL\}VK00018$  (UAS-ChR2.XXL, BDSC# 58374),  
140 and  $dnc^1$  (BDSC# 6020). Flies with Gal4 and UAS transgene insertions were

141 outcrossed to a CS background for several generations because we found that *white*  
142 knock-out backgrounds may be learning deficient in this task (*data not shown*).

143

#### 144 *Design of the Y-Track Apparatus*

145         The Y-Track conditioning apparatus was designed as a 4 layered structure. The  
146 first (top) layer of the structure was a 3D printed holder for a USB camera (ELP-  
147 USBFHD01M) and 3.6mm S-mount lens facing downward toward the track. The second  
148 layer was a mount for a red filter (Tiffen #25 Red) to block light blue and green light from  
149 optogenetic activation and light landmark experiments. These top layers are supported  
150 by four 3D pillars on each side of the apparatus. Red LEDs (630nm, Vishay  
151 VLDS1235G) were attached to each pillar and illuminated the Y-Track area. The third  
152 layer of the apparatus was the Y-Track itself. Two versions of the Y-Track were tested:  
153 a square-walled track and a curved floor track. In the square-walled track, the width of  
154 the hallways was 3.5 mm and the height of the hallways was 2.5 mm. In the curved floor  
155 track, the track surface was described by a circular arc with a diameter of 9 mm. The  
156 width of the top of the hallways was 6.7 mm and the height at the middle of the hallways  
157 was 1.5 mm. In both tracks, each of the three hallways that made up the Y shape was  
158 20mm long, the hallways met in the middle of the track, and the hallways had 120°  
159 radial spacing. At the end of each arm of the maze was a circular plastic holder for  
160 reward filter paper (“food circle”) securely screwed to a servomotor (Towerpro MG91).  
161 Each food circle had two filter paper slots, one for a sucrose-soaked filter paper and the  
162 other for a water-soaked filter paper. The top of the Y-Track was covered by a clear  
163 acrylic plate with a small hole for aspirating flies, machined by the Brandeis University

164 Machine Shop. A small 3D frame with 3 RGB LEDs (Broadcom HSMF-C114) was  
165 superglued below the Y-Track to deliver optogenetic stimulation and landmark location  
166 cues. The fourth (bottom) layer of the Y-Track apparatus is a frame that positions the  
167 servomotors correctly relative to the Y-Track and secures the entire apparatus to the  
168 base. Modelling of the 3D printed components was done using Autodesk Fusion 360  
169 (San Rafael, CA). These components were fabricated from Polylactic Acid (PLA)  
170 filament in the Brandeis MakerLab.

171 This apparatus was controlled by a custom Java program running on an Udo  
172 X86 Advanced Plus single-board computer. The JavaGrinders library was used to  
173 interface with the camera and servomotors (Donelson et al., 2012). Servomotors were  
174 controlled via a Phidget Advanced Servo (Phidgets, Calgary, CA). Red LEDs  
175 illuminating the Y-Track were powered by a BuckPuck (LuxDrive, 03021-D-E-700). The  
176 Y-Track apparatus and electronics were securely mounted inside a custom-built particle  
177 board box to provide environmental isolation. The internal walls of the box were painted  
178 white to reduce visual cues and a 120mm low-noise ventilation fan was installed to  
179 prevent overheating. Each Y-Track single-board computer was connected to a central  
180 control computer and controlled remotely via Virtual Network Computing (VNC). Code  
181 and 3D models are available on GitHub (<https://github.com/Griffith-Lab>).

182

### 183 *Learning Assay*

184 Flies were collected 0-1 days post-eclosion (dpe) and housed in mixed-sex vials  
185 for 24 hours to allow mating. The flies were then screened under light CO<sub>2</sub> anesthesia  
186 and stored in single-sex vials of up to 20 flies each. Flies were housed in a 25 C



187 incubator that was only accessed during the lights-on period for 7 days prior to the  
188 experiment to ensure circadian entrainment. Each vial of flies was flipped onto fresh  
189 food at 5 dpe (48 hours before training), flipped onto a food-deprivation vial at 6 dpe (24  
190 hours before training), and trained in the Y-Track at 7 dpe. Food-deprivation vials were  
191 made by inserting a kimwipe soaked with 1mL of tap water into an empty vial.

192         Prior to introducing the flies into the Y-Track, filter paper was prepared for the  
193 food circles by pipetting 30 $\mu$ L of 2M sucrose solution (reward stimulus) or tap water  
194 (neutral stimulus) and allowing the paper to dry overnight. The dried filter papers were  
195 securely placed into the food circles, and the positioning of the servomotors was  
196 adjusted to ensure that the flies could access only the intended stimulus and were not  
197 able to escape. Following the final positioning of the motors, a reference image of the Y-  
198 Track without a fly present was captured for background subtraction during the  
199 experiment. Finally, the reward direction for the experiment and the sex of the  
200 experimental animal was chosen based on the experimental design. In the square-wall  
201 experiment, half of the flies were rewarded for turning right and the other half were  
202 rewarded for turning left. We found no difference between training efficacy between the  
203 reward directions, so subsequent experiments used left-turn rewards for all animals. In  
204 the square-wall experiment, half of the animals were male and half were female. We did  
205 not find a significant difference between male and female flies in this experiment, but we  
206 did note that males died more rapidly during food deprivation. To reduce variability in  
207 food deprivation, subsequent experiments used only female flies. Training was  
208 performed during the lights-on period of the fly's circadian day, Zeitgeber time 0-9.

209           At the beginning of a standard training session, a single fly was aspirated out of  
210 the food deprivation vial into a Y-Track apparatus, and the lid of the track was secured  
211 in place to prevent escape. The Java control program was initialized to run the  
212 remainder of the experimental protocol, as follows: 1) The fly was given five minutes to  
213 acclimate to the maze with no sucrose presented. This acclimation time was a fixed  
214 interval and not dependent upon fly locomotion. 2) Block 0 began (Trials 1-20) and  
215 left/right turn decisions were recorded. No sucrose was presented. Block 0 was a  
216 locomotion-dependent acclimation period to ensure the fly is navigating the track. 3)  
217 Block 1 began (Trial 21). All servomotors turn to present the sucrose-soaked filter paper  
218 to the fly. A trial was initiated when the fly came within 6 mm of the center of the arena  
219 (“center zone”). If the fly back-tracked into the arm of arena it previously occupied, the  
220 servomotor turned and presented the water-soaked filter paper until the fly re-entered  
221 the center zone, but the trial continued. If the fly turned in the unrewarded direction, the  
222 servomotor turned and presented the water-soaked filter paper, ending the trial. If the fly  
223 turned in the rewarded direction, the servomotor did not turn, and the fly was given  
224 access to the sucrose-soaked filter paper, ending the trial. After a rewarded trial, the fly  
225 was given 10 seconds to consume sucrose. If the fly did not initiate a new trial by  
226 entering the center zone within 10 seconds, the servomotor turned and presented the  
227 water-soaked filter paper until the fly initiated a new trial. 4) After Trial 160, the fly was  
228 removed from the Y-Track.

229           In the open-loop, yoked-control experiment (Fig. 3), acclimation and trials were  
230 defined exactly as in the standard protocol. However, instead of trials being rewarded or  
231 unrewarded based on turn direction, trial outcome was determined by the reward/non-

232 reward sequence of a previously run fly. In the visual land-mark experiment (Fig. 4), the  
233 training protocol was the same as the standard experiment but a single green LED (525  
234 nm peak) was illuminated under the Y-Track. In optogenetics experiments, flies were  
235 fed food supplemented with either 1.6 mM all trans retinal (ATR) dissolved in ethanol  
236 (4% final concentration), or ethanol alone as a Vehicle control. Food deprivation vials  
237 were also supplemented with ATR or Vehicle in the same concentration as the food.  
238 During ATR supplementation flies were housed in the dark to prevent premature  
239 activation of ChR2.XXL expressing neurons. During training, blue LEDs (470 nm peak)  
240 were illuminated for 5 minutes after the initiation of Trial 50 (Block 2).

241

#### 242 *Quantification of Activity and Rest*

243 During training, the frame-by-frame coordinates of each fly, trial times, and trial  
244 outcomes were recorded. Coordinates were processed following training to remove  
245 incorrect detections, which were identified by fly coordinates outside the Y-Track region  
246 or a change in position faster than a fly could plausibly execute (Mendes et al., 2013).  
247 Gaps in data introduced by this error checking were filled by a linear interpolation of fly  
248 position. The position of the fly over time was used to determine when the fly was  
249 active: activity episodes were continuous periods of movement greater than 1 px /  
250 frame, in which the fly also exceeded 2 px / frame at least once. The activity/inactivity  
251 sequence was used to find rest episodes, which were then used to classify flies as  
252 drowsy, restless, or late-resting. Finally, the error corrected sequence of left/right turn  
253 directions was compared to the real-time turn direction determined during training. If  
254 more than 10% of the trial outcomes differed between the real-time and post-hoc

255 methods, the data from the fly was excluded from further analysis. Analysis code  
256 implementing this process is available on GitHub (<https://github.com/Griffith-Lab>).

257

### 258 *Experimental Design and Statistical Analysis*

259 Experiments were designed with change in Preference Index ( $\Delta PI$ ) as the primary  
260 measure of learning. Preference Index (PI) was defined as the preference for the  
261 rewarded turn direction and equal to  $(\# \text{correct turns} - \# \text{incorrect turns}) / \# \text{total turns}$ .  $\Delta PI$   
262 was defined as the difference between the PI in Block 8 vs. Block 2. The one-sample  
263 Kolmogorov-Smirnov test was used to test for normality in our  $\Delta PI$  data. A two-sample  
264 unpaired t-test was used to compare the drowsy and restless  $\Delta PI$  groups. For the no-  
265 sucrose experiment in which there were not enough drowsy flies, a one-sample t-test  
266 was used to test for a significance difference from zero. Comparisons of behavior  
267 between flies in square-walled and curved-floor Y-Tracks were performed using Two-  
268 Factor ANOVAs and Tukey-procedure protected *post-hoc* tests. Within figures, groups  
269 that are not statistically different are identified by the same letter assignment.  
270 Coordinate data and statistics were calculated using MATLAB (MathWorks, Natick, MA)  
271 and 0.05 was used as the p-value for statistical significance.

272

## 273 **RESULTS**

### 274 *Flies That Rest Learn the Operant Contingency in a Novel Sucrose-seeking Task*

275 We used an ethology-informed approach to design a positive-valence operant  
276 conditioning paradigm. Flies locomote spontaneously while awake (Martin et al., 1999),  
277 forage for food in open fields (Hughson et al., 2018), and are adept at navigational tasks

278 (Warren et al., 2019). We therefore used food-seeking and navigation as the central  
279 features of the learning paradigm (Fig. 1A). Flies are individually loaded into a Y-shaped  
280 track (Y-Track). At the terminus of each arm of the track is a reward location that can be  
281 switched between a food reward and a neutral stimulus. Food reward is only available  
282 when the flies turn in the in the rewarded direction (*i.e.* left or right) relative to their  
283 previous location in the track. Because the rewarded choice is defined relative to the  
284 location of the animal, the location of the next rewarded location changes based on the  
285 previous behavioral choice and no single arm of the track is preferentially rewarded.  
286 Over many left/right choices (“trials”), the turn preference index (PI) is calculated for  
287 blocks of 20 trials as  $PI = (\# \text{ correct turns} - \# \text{ incorrect turns}) / \# \text{ total turns}$ . Because  
288 baseline left/right turn preference is idiosyncratic to individual flies (Buchanan et al.,  
289 2015), learning is measured as the change in PI across training to determine if the flies  
290 increase their preference for turning in the direction of food reward.

291         Implementing this task in a physical apparatus required satisfying several design  
292 constraints (Fig. 1B,C). First, the animal must be alert, healthy, and active to engage in  
293 spontaneous locomotion and learning. We included a loading port in a tightly fitted Y-  
294 Track lid that allowed us to load and remove flies without anesthesia using gentle  
295 aspiration. Second, the apparatus must include a detector element that records the  
296 performance of the reinforced behavior in real time. We used JavaGrinders real-time  
297 video tracking to measure locomotor behavior and turn choices (Donelson et al., 2012).  
298 Third, the apparatus must be able to actuate reward delivery based on the behavioral  
299 contingency. We used closed-loop control to allow the real-time tracker to activate  
300 servomotors at the terminus of each arm of the Y-Track and present either 10 seconds

301 of access to a food reward (filter paper pre-soaked with 2M sucrose) or a neutral  
302 stimulus (plain filter paper). Importantly, the servomotors turn to present sucrose at both  
303 termini while the fly is in the center of the Y-Track. The flies are not able to determine  
304 which arm is rewarded simply by smelling or seeing reward. In trials where the fly turns  
305 in the non-reinforced direction, the servomotor is actuated rapidly enough that the fly is  
306 never able to actually obtain food.

307 In order to validate the sensitivity of the real-time tracking, we compared long-  
308 term recordings of living flies to dead flies (*i.e.* flies that have no genuine locomotion;  $n$   
309 = 2 per group; Fig. 1C). We found that the tracked position of the dead flies was  
310 contained within a radius of 1 pixel over several hours. Locomotor episodes were  
311 therefore defined as continuous sequences of frames in which the fly moved at least  
312 one pixel, with the requirement that the fly must exceed a speed of 2 pixels/frame (0.38  
313 mm/s) for at least one frame. Flies frequently paused between locomotor episodes,  
314 sometimes for extended periods of time. We defined pauses of greater than 1 minute as  
315 “rest” (Fig. 1D).

316 Throughout the prototyping process, we evaluated the effectiveness of our  
317 apparatus in shaping wild type (WT) fly behavior. In pilot experiments ( $n = 15$ , WT flies,  
318 mixed sex), we found a small training effect of making sucrose available contingent  
319 upon turn direction in the center of the Y-Track. Interestingly, change in turn direction  
320 preference was correlated with time spent resting during training (Pearson’s  $R = 0.50$ ).  
321 In order to rigorously test the hypothesis that rest is correlated with learning in the Y-  
322 Track, we trained a large cohort of flies ( $n = 85$  female, 87 male; Fig. 1F-I). Of this  
323 cohort, 11 (7%) rested early in training (3 minutes or more in Block #1-3). An additional

324 16 (9%) had high rest late in training (9 minutes or more in Block #4-6) and were  
325 excluded because WT flies reduce food seeking behavior during high sleep times  
326 (Donelson et al., 2012). Flies that did not rest showed no increase in turn preference in  
327 the direction of reward, indicating that they did not learn the task. However, consistent  
328 with our pilot results, flies with early rest had a significantly increased likelihood of  
329 turning in the direction of reward compared with flies that had low rest (Two-sample T-  
330 test;  $t(148) = 2.1$ ;  $p = 0.035$ ; Fig. 1G-I). These results indicate that WT flies learn a  
331 sucrose-rewarded operant contingency only when they rest in the first half of the  
332 training trials. Because of the behavioral importance of these rest-defined groups, we  
333 will refer to flies that rest early in training as “drowsy” flies, and flies with low rest as  
334 “restless” flies.

335

### 336 *Y-Track Geometry Significantly Affects Thigmotaxis and Spontaneous Alternation*

337 Operant conditioning paradigms designed for flies can be confounded by sensory  
338 cues; when presented with both an operant contingency and a classical prediction cue,  
339 flies preferentially attend to the classical cue (Brembs and Plendl, 2008). No classical  
340 cues were intentionally introduced into the Y-Track, but an examination of locomotor  
341 behavior of the in the apparatus revealed strong thigmotaxis behavior (Fig. 2A). This is  
342 consistent with the behavior of flies in open-arenas (Simon and Dickinson, 2010), but it  
343 is potentially problematic for the Y-Track task for three reasons. First, if flies maintain  
344 contact with the wall through the vertex of the Y-Track, turn direction is correlated with a  
345 unilateral touch stimulus, which may act as a classical predictor. Second, it is unclear  
346 where the “choice point” for choosing a turn direction is located – presumably at

347 whatever track location the flies “attach” to one of walls. Third, thigmotaxis may  
348 contribute to spontaneous alternation (Lewis et al., 2017), another behavior typical of  
349 unmanipulated WT flies. Spontaneous alternation would not independently result in flies  
350 preferring the rewarded turn direction, but, in simulated behavior, alternation magnifies  
351 small turn biases into large turn preference indices (Fig. 2C). If the effect of early rest is  
352 to modulate spontaneous alternation, it may be that restless and drowsy flies have the  
353 same mild change in “true” turn bias, and the difference in turn preference index is due  
354 to changes in alternation.

355 To address the sensory-motor confounds of thigmotaxis, we designed a second  
356 iteration of the Y-Track with gently curved floor, similar to open-field arenas (Simon and  
357 Dickinson, 2010). Thigmotaxis was dramatically reduced in the curved floor track  
358 compared to the square wall track in a heat map of location preference, including as the  
359 flies pass through the vertex of the track ( $n = 103$  WT female; Fig. 2B). Median distance  
360 from the wall is significantly smaller in the square-wall design than it is in the curved  
361 floor design for both drowsy and restless flies (Two-way ANOVA;  $F(1,1) = 2788$ ;  $p <$   
362  $0.0001$ ; Fig. 2D). There was no difference in thigmotaxis between drowsy and restless  
363 flies within experiments (Post-hoc test; all  $p > 0.17$ ).

364 To quantify any link between thigmotaxis, spontaneous alternation, and revealed  
365 turn preference, we measured spontaneous alternation at the end of training for each of  
366 our groups of WT flies. Track geometry significantly affected alternation rate (Two-way  
367 ANOVA;  $F(1,1) = 11$ ;  $p = 0.001$ ; Fig. 2E) and drowsy flies have significantly lower  
368 alternation than restless flies (Post-hoc test; all  $p < 0.005$ ). We therefore concluded that



369 while spontaneous alternation may be related to thigmotaxis, it changes in the wrong  
370 direction to contribute to the difference in learning between restless and drowsy flies.

371

372 *Learning to Turn Toward Sucrose is Independent of Track Geometry but Dependent*  
373 *upon an Informative Operant Contingency*

374 The curved floor track geometry dramatically reduces thigmotaxis (Fig. 2), so we  
375 repeated Y-Track conditioning in curved floor apparatus to determine if the sensory-  
376 motor experience of thigmotaxis contributes to Y-Track learning (Fig. 3A). Learning in  
377 the curved floor track ( $n = 103$  WT female flies) was similar to learning in the square  
378 wall track. The percentage of drowsy flies was not different between the square wall and  
379 curved floor tracks (Fisher's Exact Test;  $p = 0.8$ ). Drowsy flies in the curved floor track  
380 (8 of 103) significantly increased their likelihood of turning toward reward compared to  
381 restless flies (Two-sample T-test;  $t(100) = 2.5$ ;  $p = 0.015$ ; Fig. 3B-D).

382 In order to control for any confounding effect of time spent in the experimental  
383 apparatus on turn direction preference, we also performed an open-loop, "yoked"  
384 control in the curved floor track ( $n = 110$  WT female flies). In the yoked control flies, the  
385 reward sequence of a previously trained fly was presented to a naïve fly independent of  
386 the turning behaviors of the naïve fly. The yoked control flies therefore had the same  
387 amount of sucrose/reward access as trained flies, but there was no behavioral  
388 contingency. As predicted, drowsy yoked control flies (8 of 110) did not show a  
389 significant change in turn direction compared with restless flies (Two-sample T-test;  
390  $t(107) = 0.03$ ;  $p = 0.98$ ; Fig. 3E-H). These results allow us to conclude that the change  
391 in turn preference is due to learning of the operant contingency, and not dependent

392 upon sensory-motor feedback from thigmotaxis. The curved floor Y-Track was used for  
393 all subsequent experiments because learning is equivalent to the square wall track,  
394 without the potential confounding effect of thigmotaxis.

395

### 396 *A World Orientation Cue does not Facilitate Learning the Operant Task*

397 The curved floor Y-Track experiment (Fig. 3) removes the potential for an  
398 egocentric sensory-motor classical confound. We next considered the possibility that  
399 the flies were attending to an inadvertently introduced world-orientation cue rather than  
400 the operant contingency. In order to test this hypothesis, we trained flies in the presence  
401 of a strong orientation cue ( $n = 81$  WT female flies). A green LED was illuminated  
402 beneath one arm of the Y-Track, creating a stable, mildly attractive, landmark (Fig. 4A).  
403 In the presence of this landmark, drowsy flies did not show a significant change in turn  
404 direction compared with restless flies (Two-sample T-Test;  $t(73) = 0.17$ ;  $p = 0.86$ ; Fig.  
405 4B-D). This result indicates that the presence of a world orientation cue does not  
406 enhance learned change in turn preference. Together, the results of the thigmotaxis,  
407 alternation, and orientation cue experiments indicate that neither sensory inputs nor  
408 motor patterns explain the change in turn preference in the direction of reward observed  
409 in drowsy flies. We conclude that the learning produced in this paradigm is navigational  
410 and operant in character.

411

### 412 *Sucrose Promotes Rest and is the Only US Attended to by Flies in the Y-Track*

413 Operant conditioning is a learned association between behavior and a US, and  
414 the strength of the US influences the strength of the learned association (Rickard et al.,

415 2009). Rest is strongly regulated by feeding and nutritional state (Murphy et al., 2016),  
416 and the consumption and hedonic value of sugar is dependent upon the state of the fly  
417 (Krashes et al., 2009; Li et al., 2020). While we have shown that there is a correlation  
418 between early rest and learning, it is not clear how they are connected mechanistically.  
419 One possibility is that there may be a difference in the consumption of, or response to,  
420 the sucrose US that explains enhanced learning in drowsy flies. In order to test the  
421 hypothesis that drowsy flies receive a more rewarding US (either due to consumption  
422 quantity or reward value), we analyzed the relationship between time spent adjacent to  
423 sucrose and learning (Fig. 5A). We found that there is a significant main effect of early  
424 rest on time adjacent to sucrose (Two-way ANOVA; both  $F(1,1) > 4.5$ ; both  $p < 0.035$ ),  
425 but the difference between drowsy and restless flies is only significant at the group level  
426 in the flies trained in the square walled Y-Track (post-hoc test;  $p = 0.016$ ). However,  
427 there was no correlation between time spent adjacent to sucrose and change in turn  
428 preference (Pearson correlation; Square Wall  $R = 0.12$ , Curved Floor  $R = -0.01$ ; Fig.  
429 5B). Increased sucrose consumption is associated with additional rest, but it is not  
430 associated with increased learning.

431 To validate the finding that sucrose consumption promotes rest, we trained flies  
432 in a Y-Track with no sucrose available ( $n = 78$  WT female flies). Remarkably, only 2 flies  
433 in this cohort had early rest, a 3-fold reduction in drowsy flies compared to training with  
434 sucrose available (Fig. 5D). The restless flies in the no-sucrose experiment did not have  
435 a significant change in turn preference following training (One-sample T-test;  $t(75) = 1.2$ ;  
436  $p = 0.25$ ; Fig. 5E-F). Together, increased time adjacent to sucrose in drowsy flies and  
437 the reduction in the number of drowsy flies when sucrose is removed from the Y-Track

438 indicate that sugar consumption promotes rest. The lack of residual learning in the Y-  
439 Track when sucrose is removed also shows that sucrose is the learning-relevant US.

440

#### 441 *Optogenetically-Induced Sleep is Not Sufficient to Enhance Learning*

442       Activation of several genetically-targetable cell types in flies is sufficient to induce  
443 sleep (Donlea et al., 2011; Liu et al., 2016). Activation of these cells has the same effect  
444 on sleep-dependent learning as spontaneous or pharmacologically-induced sleep  
445 (Donlea et al., 2011; Dissel et al., 2015). We therefore tested the hypothesis that sleep  
446 is sufficient to enhance learning of turn direction in the Y-Track by optogenetically  
447 activating sleep-promoting neurons. Flies do not synthesize the cofactor of Channel  
448 Rhodopsin (ChR), All-Trans Retinal (ATR), so ATR needs to be added to the food to  
449 functionalize the channels (Zhang et al., 2006). We tested optogenetic sleep induction  
450 using a dorsal Fan-Shaped Body driver (dFSB; 104y-Gal4;  $n = 39$  ATR, 45 Vehicle), or  
451 an Ellipsoid Body driver (EB; VT058968-Gal4;  $n = 56$  ATR, 54 Vehicle) driving  
452 expression of ChR2.XXL (Dawydow et al., 2014), and WT control flies ( $n = 43$  ATR, 36  
453 Vehicle) (Fig. 6A). Sleep was induced by turning on blue LEDs located under the Y-  
454 Track for 5 minutes at the mid-point of Training Block 2. Lights were symmetrically  
455 located in all arms of the Y-Track, so they did not provide a world orientation cue. Blue  
456 light did not increase sleep in WT flies fed ATR or vehicle, but dramatically increased  
457 sleep in the dFSB and EB driver flies (Fig. 6B). The drivers differed in both potency and  
458 on/off kinetics: the dFSB driver rapidly induces sleep in all ATR fed flies, and flies woke  
459 from sleep shortly after the light was turned off. In contrast, the EB driver induced a  
460 lower level of sleep that persisted even after the blue light was removed (Fig. 6B). Both

461 drivers dramatically increased the % flies with early rest (Fig. 6C). Despite this robust  
462 rest induction, neither driver was sufficient to increase learning. Turn preference in early  
463 resting flies was not significantly different from non-resting flies in the dFSB induction  
464 experiment (Two-sample T-Test;  $t(77) = 0.71$ ;  $p = 0.48$ ; Fig. 6D,E) or in the EB induction  
465 experiment (Two-sample T-Test;  $t(96) = 0.65$ ;  $p = 0.52$ ; Fig. 6F,G). The effect of rest  
466 induction is not to increase learning, but instead to dilute the drowsy group with non-  
467 learning flies, effectively erasing the difference between the restless and drowsy groups.  
468 We conclude that while spontaneous early rest is associated with increased learning of  
469 the navigational task, rest itself is not sufficient to induce learning.

470

#### 471 *Y-Track Operant Learning is Dependent on cAMP Regulation*

472 The Y-Track task we have developed is an operant, navigational, sucrose-  
473 reinforced learning paradigm, in which learning is revealed by changes in turn  
474 preference from baseline (Fig. 1,3). Many neurotransmitters, receptors, and second  
475 messengers necessary for classical conditioning in flies have been identified using  
476 genetic knockouts (Margulies et al., 2005). While cyclic adenosine monophosphate  
477 (cAMP) is important for the formation of classical conditioning (Zars et al., 2000), a  
478 previous study found that activity-regulated cAMP synthesis is not necessary for the  
479 formation of aversive operant conditioning (Brembs and Plendl, 2008). In order to  
480 determine if regulation of cAMP is necessary for formation of appetitive operant  
481 conditioning, we tested the performance of flies mutant for the *dunce*  
482 phosphodiesterase (*dnc<sup>1</sup>*). *dnc<sup>1</sup>* flies fail to learn in classical paradigms and fail to  
483 modulate cAMP in response to learning stimuli (Gervasi et al., 2010). In an independent

484 cohort ( $n = 209$  WT female flies), we reproduced our earlier result that flies with early  
485 rest ( $n = 19$ ) increase turn preference in the direction of reward (Two-sample T-test;  
486  $t(200) = 2.1$ ;  $p = 0.036$ ; Fig. 7A-C). Flies carrying the *dnc*<sup>1</sup> mutation failed to show  
487 learning ( $n = 95$  female flies): the turn preference of drowsy and restless flies were not  
488 significant different (Two-sample t-test;  $t(88) = 0.95$ ;  $p = 0.34$ ; Fig. 7D-F).

489

## 490 **DISCUSSION**

491 The formal study of associative learning has been remarkably successful:  
492 experimentally-induced associative memory has been demonstrated across the animal  
493 kingdom and dozens of genes, neurotransmitters, second messengers, and neural  
494 structures have been implicated in its formation (Mayford et al., 2012). Within the  
495 context of fly learning, animals have been trained to texture (Platt et al., 1980), sound  
496 (Menda et al., 2011), color (Schnaitmann et al., 2010), location (Wustmann et al., 1996),  
497 and odor (Quinn et al., 1974), among other cues. The fly learning literature developed  
498 rapidly, with first reports of training paradigms for classical conditioning to an aversive  
499 US, operant conditioning to an aversive US, and classical conditioning to a rewarding  
500 US occurring within a decade of one another (Quinn et al., 1974; Booker and Quinn,  
501 1981; Tempel et al., 1983). In this report, we present the first paradigm for operant  
502 conditioning of flies to a sucrose US: Y-Track conditioning (Fig. 1). The learning we  
503 observe is dependent upon rest (Fig. 1,3), does not depend on sensory cues (Fig. 2,4),  
504 and requires cAMP as a second messenger (Fig. 7). However, rest is not sufficient for  
505 learning as we see no learning enhancement in optogenetically induced rest (Fig. 6),  
506 indicating that rest does not indiscriminately promote learning in the Y-Track. Y-Track

507 training has implications for navigation, learning and memory, and the connection  
508 between sleep and learning in *Drosophila*.

509

### 510 *Learning, Memory and Rest in Drosophila*

511 Disorders of sleep and associative learning co-occur in several categories of  
512 neurological disease. Primary sleep disorders and sleep deprivation result in decreased  
513 cognitive and memory performance (Kessler et al., 2011; Shekleton et al., 2014;  
514 Zamarian et al., 2015). Conversely, plasticity disorders such as neurodevelopmental  
515 disability and post-traumatic stress disorder have co-morbid sleep abnormalities  
516 (Angriman et al., 2015; Gilbert et al., 2015). Finally, neurodegenerative disorders,  
517 including dementia, Huntington's disease, and Parkinson's disease, frequently disrupt  
518 both sleep and memory (Chaudhuri and Naidu, 2008; Morton, 2013; Robbins and  
519 Cools, 2014; Porter et al., 2015). The widespread connections between learning and  
520 sleep in human neurological disease indicate that there are neuronal circuits linking, or  
521 shared by, sleep and learning in humans. Similar to the sleep/learning connection in  
522 human disease, sleep and learning regulate one another in flies: sleep deprivation  
523 decreases learning (Seugnet et al., 2008) and learning increases time spent asleep  
524 (Ganguly-Fitzgerald et al., 2006). Remarkably, increased sleep is sufficient to rescue  
525 memory formation in learning mutant flies, aged flies, and in a fly model of Alzheimer's  
526 disease (Donlea et al., 2014; Dissel et al., 2015), demonstrating that the shared circuit  
527 can be therapeutically useful.

528 Learning in the Y-Track conditioning task we have developed depends upon rest  
529 during training (Fig. 1,3). We have described prolonged locomotor pauses as "rest"

530 rather than “sleep” because sleep has a precise, three-fold definition (quiescence,  
531 increased arousal threshold, homeostasis) and it is not possible to properly evaluate  
532 this definition on the Y-Track (Hendricks et al., 2000; Shaw et al., 2000). We  
533 hypothesize that the locomotor pauses that we classify as rest are “sleep-like.” In light of  
534 the extensive links between sleep and learning in flies, we proposed three hypotheses  
535 that could account for the correlation between rest and learning in the Y-Track: First, we  
536 hypothesized that learning could drive increased rest. This hypothesis is inconsistent  
537 with the similar amounts of rest observed in populations of flies that learn and those that  
538 do not (*i.e.* yoked controls and *dunce* mutants; Fig. 3,7). Next, we hypothesized that rest  
539 drives increased learning. Sleep is known to promote consolidation of memory both in  
540 mammals and flies (Buhry et al., 2011; Donlea et al., 2011). However, we do not find  
541 that optogenetically-induced rest promotes learning (Fig. 6). This failure to promote  
542 learning could be due to induced rest not promoting the learning-associated sleep state  
543 (Liu et al., 2019; Wiggin et al., 2020), or it could also be the case that the precise timing  
544 of rest is important to its learning-associated function. We refined this hypothesis to  
545 instead propose that rest acts as a gate to learning. In this model, a coincidence  
546 between behavior and US must be detected, presumably by a cAMP-dependent  
547 mechanism (Fig. 7). Following this coincidence detection event, sleep is required within  
548 a tight temporal window in order to consolidate the memory and prevent locomotion-  
549 related forgetting (Berry et al., 2015). While this rest-as-a-gate model is consistent with  
550 our behavioral characterization, we cannot eliminate the alternative explanation that  
551 both rest and learning are driven by a covert common factor, such as a low frequency  
552 genetic variant in wild type *Drosophila* (Croze et al., 2017).



553

554 *Neural Circuits of Navigation as a Locus for Operant Plasticity*

555         Identifying plastic neuronal circuits that are responsible for learning is a subject of  
556 intense interest in the effort to understand learning, memory, and cognition. In flies, the  
557 mushroom bodies are the best studied locus of learning-related plasticity. Learning of  
558 sensory cues in flies, including odors and visual cues, is mediated by mushroom body  
559 circuits (Aso et al., 2014; Vogt et al., 2014). The identification of the mushroom body as  
560 an important learning center proceeded primarily from neuroanatomy, including their  
561 connections to sensory projection neurons (Davis, 1993). Because operant conditioning  
562 is not primarily a sensory-driven behavior, a sensory-first search for neural circuits is  
563 unlikely to uncover the locus of plasticity that underlies operant learning. In fact, operant  
564 conditioning in the fly is mushroom body independent (Wolf et al., 1998; Brembs, 2009),  
565 while behavioral output circuits in the ventral nerve cord, such as motor neurons, have  
566 been implicated instead (Booker and Quinn, 1981; Colomb and Brembs, 2016).  
567 However, motor neurons themselves are unlikely to be the location of behavior/US  
568 coincidence detection (Talay et al., 2017). Motor planning circuits in the fly central  
569 complex, such as those responsible for navigation, are therefore an interesting potential  
570 locus for operant plasticity.

571         Control of turn direction on the Y-Track is determined by a mix of innate motor  
572 preferences and goal-directed search strategies. Innate handedness is strongly  
573 influenced by the activity of PB-FB-No neurons (PFN) (Buchanan et al., 2015). While  
574 the synaptic partners of PFN neurons implicated in innate handedness are not yet  
575 mapped, the brain structures innervated are all heavily involved in orientation and

576 navigation in the fly (Giraldo et al., 2018; Shiozaki et al., 2020). Fly orientation circuits  
577 show rapid plasticity and features of short-term memory (Fisher et al., 2019) and are  
578 strongly responsive to visual stimuli (Seelig and Jayaraman, 2015). If fly orientation  
579 circuits are part of an operant conditioning pathway, this mix of plasticity and visual  
580 responses would account for both behavioral plasticity and our finding that a strong  
581 visual stimulus inhibits learning rather than promoting it (Fig. 4).

582         In addition to innate preferences, flies display strong learned place preference  
583 and goal directed search behaviors (Ofstad et al., 2011; Kim and Dickinson, 2017).  
584 Development of a location preference is capable of overriding innate preferences  
585 (Baggett et al., 2018) and foraging flies modify their innate locomotor preferences to  
586 repeatedly visit remembered sites of food and search for nearby food sources (Kim and  
587 Dickinson, 2017). The formation of spatial memories has been previously linked to  
588 cAMP as a coincidence detector (Zars et al., 2000), consistent with our finding that  
589 cAMP regulation is necessary for Y-Track conditioning (Fig. 7). Our behavioral results  
590 are congruent with either plasticity happening directly in orientation/innate preference  
591 circuits, or in a foraging/place preference circuit. Further characterization of the neural  
592 components of spatial memory in flies is necessary for these possibilities to be  
593 distinguished.

594 **REFERENCES**

- 595 Angriman M, Caravale B, Novelli L, Ferri R, Bruni O (2015) Sleep in children with  
596 neurodevelopmental disabilities. *Neuropediatrics* 46:199–210.
- 597 Aso Y et al. (2014) Mushroom body output neurons encode valence and guide memory-  
598 based action selection in *Drosophila*. *Elife* 3:e04580.
- 599 Baggett V, Mishra A, Kehrer AL, Robinson AO, Shaw P, Zars T (2018) Place learning  
600 overrides innate behaviors in *Drosophila*. *Learn Mem* 25:122–128.
- 601 Berry JA, Cervantes-Sandoval I, Chakraborty M, Davis RL (2015) Sleep Facilitates  
602 Memory by Blocking Dopamine Neuron-Mediated Forgetting. *Cell* 161:1656–1667.
- 603 Booker R, Quinn WG (1981) Conditioning of leg position in normal and mutant  
604 *Drosophila*. *Proc Natl Acad Sci U S A* 78:3940–3944.
- 605 Brembs B (2009) Mushroom Bodies Regulate Habit Formation in *Drosophila*. *Curr Biol*  
606 19:1351–1355.
- 607 Brembs B, Plendl W (2008) Double Dissociation of PKC and AC Manipulations on  
608 Operant and Classical Learning in *Drosophila*. *Curr Biol* 18:1168–1171.
- 609 Buchanan SM, Kain JS, de Bivort BL (2015) Neuronal control of locomotor handedness  
610 in *Drosophila*. *Proc Natl Acad Sci* 112:6700–6705.
- 611 Buhry L, Azizi AH, Cheng S (2011) Reactivation, replay, and preplay: how it might all fit  
612 together. *Neural Plast* 2011:203462.
- 613 Chaudhuri KR, Naidu Y (2008) Early Parkinson's disease and non-motor issues. *J*  
614 *Neurol* 255 Suppl:33–38.
- 615 Chóliz M (2010) Experimental Analysis of the Game in Pathological Gamblers: Effect of  
616 the Immediacy of the Reward in Slot Machines. *J Gambli Stud* 26:249–256.

617 Colomb J, Brembs B (2016) PKC in motorneurons underlies selflearning, a form of  
618 motor learning in *Drosophila*. PeerJ 2016.

619 Croze M, Wollstein A, Božičević V, Živković D, Stephan W, Hutter S (2017) A genome-  
620 wide scan for genes under balancing selection in *Drosophila melanogaster*. BMC  
621 Evol Biol 17.

622 Davis RL (1993) Mushroom bodies and *drosophila* learning. Neuron 11:1–14.

623 Dawydow A, Gueta R, Ljaschenko D, Ullrich S, Hermann M, Ehmann N, Gao S, Fiala A,  
624 Langenhan T, Nagel G, Kittel RJ (2014) Channelrhodopsin-2-XXL, a powerful  
625 optogenetic tool for low-light applications. Proc Natl Acad Sci U S A 111:13972–  
626 13977.

627 DeJianne D, McGuire TR, Pruzan-Hotchkiss A (1985) Conditioned suppression of  
628 proboscis extension in *Drosophila melanogaster*. J Comp Psychol 99:74–80.

629 Dissel S, Angadi V, Kirszenblat L, Suzuki Y, Donlea J, Klose M, Koch Z, English D,  
630 Winsky-Sommerer R, van Swinderen B, Shaw PJ (2015) Sleep restores behavioral  
631 plasticity to *Drosophila* mutants. Curr Biol 25:1270–1281.

632 Donelson NC, Donelson N, Kim EZ, Slawson JB, Vecsey CG, Huber R, Griffith LC  
633 (2012) High-resolution positional tracking for long-term analysis of *Drosophila* sleep  
634 and locomotion using the “tracker” program. PLoS One 7:e37250.

635 Donlea JM, Ramanan N, Silverman N, Shaw PJ (2014) Genetic rescue of functional  
636 senescence in synaptic and behavioral plasticity. Sleep 37:1427–1437.

637 Donlea JM, Thimgan MS, Suzuki Y, Gottschalk L, Shaw PJ (2011) Inducing sleep by  
638 remote control facilitates memory consolidation in *Drosophila*. Science 332:1571–  
639 1576.

- 640 Fanselow MS, Wassum KM (2015) The Origins and Organization of Vertebrate  
641 Pavlovian Conditioning. *Cold Spring Harb Perspect Biol* 8:a021717.
- 642 Fisher YE, Lu J, D'Alessandro I, Wilson RI (2019) Sensorimotor experience remaps  
643 visual input to a heading-direction network. *Nature* 576:121–125.
- 644 Ganguly-Fitzgerald I, Donlea J, Shaw PJ, Tononi G, Shaw PJ (2006) Waking  
645 Experience Affects Sleep Need in *Drosophila*. *Science* 313:1775–1781.
- 646 Gatzounis R, Schrooten MGS, Crombez G, Vlaeyen JWS (2012) Operant Learning  
647 Theory in Pain and Chronic Pain Rehabilitation. *Curr Pain Headache Rep* 16:117–  
648 126.
- 649 Gervasi N, Tchénio P, Preat T (2010) PKA Dynamics in a *Drosophila* Learning Center:  
650 Coincidence Detection by Rutabaga Adenylyl Cyclase and Spatial Regulation by  
651 Dunce Phosphodiesterase. *Neuron* 65:516–529.
- 652 Gilbert KS, Kark SM, Gehrman P, Bogdanova Y (2015) Sleep Disturbances, TBI and  
653 PTSD: Implications for Treatment and Recovery. *Clin Psychol Rev* 40:195–212.
- 654 Giraldo YM, Leitch KJ, Ros IG, Warren TL, Weir PT, Dickinson MH (2018) Sun  
655 Navigation Requires Compass Neurons in *Drosophila*. *Curr Biol* 28:2845-2852.e4.
- 656 Greenspan RJ, Dierick HA (2004) “Am not I a fly like thee?” From genes in fruit flies to  
657 behavior in humans. *Hum Mol Genet* 13 Spec No:R267-73.
- 658 Hendricks JC, Finn SM, Panckeri KA, Chavkin J, Williams JA, Sehgal A, Pack AI (2000)  
659 Rest in *Drosophila* is a sleep-like state. *Neuron* 25:129–138.
- 660 Hughson BN, Anreiter I, Jackson Chornenki NL, Murphy KR, Ja WW, Huber R,  
661 Sokolowski MB (2018) The adult foraging assay (AFA) detects strain and food-  
662 deprivation effects in feeding-related traits of *Drosophila melanogaster*. *J Insect*

- 663           Physiol 106:20–29.
- 664 Kamyshev NG, Kamysheva EA, Ivanova GO (1997) Autosomal Mutations In *Drosophila*  
665           Which Reduce Operant Learning Ability. *Neurosci Behav Physiol* 27:254–257.
- 666 Kessler RC, Berglund PA, Coulouvrat C, Hajak G, Roth T, Shahly V, Shillington AC,  
667           Stephenson JJ, Walsh JK (2011) Insomnia and the performance of US workers:  
668           results from the America insomnia survey. *Sleep* 34:1161–1171.
- 669 Kim IS, Dickinson MH (2017) Idiothetic Path Integration in the Fruit Fly *Drosophila*  
670           melanogaster. *Curr Biol* 27:2227-2238.e3.
- 671 Kimble GA, Mann LI, Dufort RH (1955) Classical and instrumental eyelid conditioning. *J*  
672           Exp Psychol 49:407–417.
- 673 Korff S, Harvey BH (2006) Animal Models of Obsessive-Compulsive Disorder: Rationale  
674           to Understanding Psychobiology and Pharmacology. *Psychiatr Clin North Am*  
675           29:371–390.
- 676 Krashes MJ, DasGupta S, Vreede A, White B, Armstrong JD, Waddell S (2009) A  
677           neural circuit mechanism integrating motivational state with memory expression in  
678           *Drosophila*. *Cell* 139:416–427.
- 679 Levey DF, Gelernter J, Polimanti R, Zhou H, Cheng Z, Aslan M, Quaden R, Concato J,  
680           Radhakrishnan K, Bryois J, Sullivan PF, Stein MB (2020) Reproducible Genetic  
681           Risk Loci for Anxiety: Results From ~200,000 Participants in the Million Veteran  
682           Program. *Am J Psychiatry* 177:223–232.
- 683 Lewis SA, Negelspach DC, Kaladchibachi S, Cowen SL, Fernandez F (2017)  
684           Spontaneous alternation: A potential gateway to spatial working memory in  
685           *Drosophila*. *Neurobiol Learn Mem* 142:230–235.

- 686 Li Q, DeBeaubien NA, Sokabe T, Montell C (2020) Temperature and Sweet Taste  
687 Integration in *Drosophila*. *Curr Biol* 30:2051-2067.e5.
- 688 Liu C, Meng Z, Wiggin TD, Yu J, Reed ML, Guo F, Zhang Y, Rosbash M, Griffith LC  
689 (2019) A serotonin-modulated circuit controls sleep architecture to regulate  
690 cognitive function independent of total sleep in *Drosophila*. *Curr Biol* In Press.
- 691 Liu C, Plaçais P-Y, Yamagata N, Pfeiffer BD, Aso Y, Friedrich AB, Siwanowicz I, Rubin  
692 GM, Preat T, Tanimoto H (2012) A subset of dopamine neurons signals reward for  
693 odour memory in *Drosophila*. *Nature* 488:512–516.
- 694 Liu S, Liu Q, Tabuchi M, Wu MN (2016) Sleep Drive Is Encoded by Neural Plastic  
695 Changes in a Dedicated Circuit. *Cell* 165:1347–1360.
- 696 Maquet P (2001) The Role of Sleep in Learning and Memory. *Science* (80- ) 294:1048–  
697 1052.
- 698 Margulies C, Tully T, Dubnau J (2005) Deconstructing memory in *Drosophila*. *Curr Biol*  
699 15:R700-13.
- 700 Martin JR, Ernst R, Heisenberg M (1999) Temporal pattern of locomotor activity in  
701 *Drosophila melanogaster*. *J Comp Physiol - A Sensory, Neural, Behav Physiol*  
702 184:73–84.
- 703 Mayford M, Siegelbaum SA, Kandel ER (2012) Synapses and memory storage. *Cold*  
704 *Spring Harb Perspect Biol* 4:1–18.
- 705 Menda G, Bar HY, Arthur BJ, Rivlin PK, Wyttenbach RA, Strawderman RL, Hoy RR  
706 (2011) Classical conditioning through auditory stimuli in *Drosophila*: Methods and  
707 models. *J Exp Biol* 214:2864–2870.
- 708 Mendes CS, Bartos I, Akay T, Márka S, Mann RS (2013) Quantification of gait

709 parameters in freely walking wild type and sensory deprived *Drosophila*  
710 *melanogaster*. *Elife* 2013:231.

711 Morton AJ (2013) Circadian and sleep disorder in Huntington's disease. *Exp Neurol*  
712 243:34–44.

713 Murphey RM (1967) Instrumental conditioning of the fruit fly, *Drosophila melanogaster*.  
714 *Anim Behav* 15:153–161.

715 Murphy KR, Deshpande SA, Yurgel ME, Quinn JP, Weissbach JL, Keene AC, Dawson-  
716 Scully K, Huber R, Tomchik SM, Ja WW (2016) Postprandial sleep mechanics in  
717 *Drosophila*. *Elife* 5.

718 Nargeot R, Simmers J (2011) Neural mechanisms of operant conditioning and learning-  
719 induced behavioral plasticity in *Aplysia*. *Cell Mol Life Sci* 68:803–816.

720 Nuwal N, Stock P, Hiemeyer J, Schmid B, Fiala A, Buchner E (2012) Avoidance of Heat  
721 and Attraction to Optogenetically Induced Sugar Sensation as Operant Behavior in  
722 Adult *Drosophila*. *J Neurogenet* 26:298–305.

723 Ofstad TA, Zuker CS, Reiser MB (2011) Visual place learning in *Drosophila*  
724 *melanogaster*. *Nature* 474:204–209.

725 Ollendick TH, Vasey MW, King NJ (2001) Operant Conditioning Influences in Childhood  
726 Anxiety. In: *The Developmental Psychopathology of Anxiety*, pp 231–252. Oxford  
727 University Press.

728 Pfeiffer BD, Ngo TTB, Hibbard KL, Murphy C, Jenett A, Truman JW, Rubin GM (2010)  
729 Refinement of tools for targeted gene expression in *Drosophila*. *Genetics* 186:735–  
730 755.

731 Platt SA, Holliday M, Drudge OW (1980) Discrimination learning of an instrumental



732 response in individual *Drosophila melanogaster*. *J Exp Psychol Anim Behav*  
733 *Process* 6:301–311.

734 Porter VR, Buxton WG, Avidan AY (2015) Sleep, Cognition and Dementia. *Curr*  
735 *Psychiatry Rep* 17:97.

736 Quinn WG, Harris WA, Benzer S (1974) Conditioned behavior in *Drosophila*  
737 *melanogaster*. *Proc Natl Acad Sci U S A* 71:708–712.

738 Rickard JF, Body S, Zhang Z, Bradshaw CM, Szabadi E (2009) EFFECT OF  
739 REINFORCER MAGNITUDE ON PERFORMANCE MAINTAINED BY  
740 PROGRESSIVE-RATIO SCHEDULES. *J Exp Anal Behav* 91:75–87.

741 Robbins TW, Cools R (2014) Cognitive deficits in Parkinson's disease: a cognitive  
742 neuroscience perspective. *Mov Disord* 29:597–607.

743 Schnaitmann C, Vogt K, Triphan T, Tanimoto H (2010) Appetitive and aversive visual  
744 learning in freely moving *Drosophila*. *Front Behav Neurosci* 4:10.

745 Seelig JD, Jayaraman V (2015) Neural dynamics for landmark orientation and angular  
746 path integration. *Nature* 521:186–191.

747 Seugnet L, Suzuki Y, Vine L, Gottschalk L, Shaw PJ (2008) D1 receptor activation in the  
748 mushroom bodies rescues sleep-loss-induced learning impairments in *Drosophila*.  
749 *Curr Biol* 18:1110–1117.

750 Shaw PJ, Cirelli C, Greenspan RJ, Tononi G (2000) Correlates of sleep and waking in  
751 *Drosophila melanogaster*. *Science* 287:1834–1837.

752 Shekleton JA, Flynn-Evans EE, Miller B, Epstein LJ, Kirsch D, Brogna LA, Burke LM,  
753 Bremer E, Murray JM, Gehrman P, Lockley SW, Rajaratnam SMW (2014)  
754 Neurobehavioral performance impairment in insomnia: relationships with self-

755 reported sleep and daytime functioning. *Sleep* 37:107–116.

756 Shiozaki HM, Ohta K, Kazama H (2020) A Multi-regional Network Encoding Heading  
757 and Steering Maneuvers in *Drosophila*. *Neuron* 106:126-141.e5.

758 Simon JC, Dickinson MH (2010) A New Chamber for Studying the Behavior of  
759 *Drosophila* Hashimoto K, ed. *PLoS One* 5:e8793.

760 Skinner BF (1948) Superstition in the pigeon. *J Exp Psychol* 38:168–172.

761 Smit DJA, Cath D, Zilhão NR, Ip HF, Denys D, den Braber A, de Geus EJC, Verweij  
762 KJH, Hottenga JJ, Boomsma DI (2020) Genetic meta-analysis of obsessive–  
763 compulsive disorder and self-report compulsive symptoms. *Am J Med Genet Part B*  
764 *Neuropsychiatr Genet* 183:208–216.

765 Smith DJ et al. (2016) Genome-wide analysis of over 106 000 individuals identifies 9  
766 neuroticism-associated loci. *Mol Psychiatry* 21:749–757.

767 Stowers JR, Hofbauer M, Bastien R, Griessner J, Higgins P, Farooqui S, Fischer RM,  
768 Nowikovsky K, Haubensak W, Couzin ID, Tessmar-Raible K, Straw AD (2017)  
769 Virtual reality for freely moving animals. *Nat Methods* 14:995–1002.

770 Susswein AJ, Schwarz M, Feldman E (1986) Learned changes of feeding behavior in  
771 *Aplysia* in response to edible and inedible foods. *J Neurosci* 6:1513–1527.

772 Talay M, Richman EB, Snell NJ, Hartmann GG, Fisher JD, Sorkaç A, Santoyo JF,  
773 Chou-Freed C, Nair N, Johnson M, Szymanski JR, Barnea G (2017) Transsynaptic  
774 Mapping of Second-Order Taste Neurons in Flies by trans-Tango. *Neuron* 96:783-  
775 795.e4.

776 Tempel BL, Bonini N, Dawson DR, Quinn WG (1983) Reward learning in normal and  
777 mutant *Drosophila*. *Proc Natl Acad Sci U S A* 80:1482–1486.

- 778 Vogt K, Schnaitmann C, Dylla K V, Knapek S, Aso Y, Rubin GM, Tanimoto H (2014)  
779 Shared mushroom body circuits underlie visual and olfactory memories in  
780 *Drosophila*. *Elife* 3:e02395.
- 781 Warren TL, Giraldo YM, Dickinson MH (2019) Celestial navigation in *Drosophila*. *J Exp*  
782 *Biol* 222.
- 783 Wiggin TD, Goodwin PR, Donelson NC, Liu C, Trinh K, Sanyal S, Griffith LC (2020)  
784 Covert sleep-related biological processes are revealed by probabilistic analysis in  
785 *Drosophila*. *Proc Natl Acad Sci U S A* 117:10024–10034.
- 786 Wolf R, Heisenberg M (1991) Basic organization of operant behavior as revealed in  
787 *Drosophila* flight orientation. *J Comp Physiol A* 169:699–705.
- 788 Wolf R, Wittig T, Liu L, Wustmann G, Eyding D, Heisenberg M (1998) *Drosophila*  
789 mushroom bodies are dispensable for visual, tactile, and motor learning. *Learn*  
790 *Mem* 5:166–178.
- 791 Wustmann G, Rein K, Wolf R, Heisenberg M (1996) A new paradigm for operant  
792 conditioning of *Drosophila melanogaster*. *J Comp Physiol A* 179:429–436.
- 793 Xu CS et al. (2020) A Connectome of the Adult *Drosophila* Central Brain.  
794 [bioRxiv:2020.01.21.911859](https://doi.org/10.1101/2020.01.21.911859).
- 795 Zamarian L, Högl B, Delazer M, Hingerl K, Gabelia D, Mitterling T, Brandauer E,  
796 Frauscher B (2015) Subjective deficits of attention, cognition and depression in  
797 patients with narcolepsy. *Sleep Med* 16:45–51.
- 798 Zars T, Wolf R, Davis R, Heisenberg M (2000) Tissue-specific expression of a type I  
799 adenylyl cyclase rescues the rutabaga mutant memory defect: In search of the  
800 engram. *Learn Mem* 7:18–31.

801 Zhang F, Wang LP, Boyden ES, Deisseroth K (2006) Channelrhodopsin-2 and optical  
802 control of excitable cells. *Nat Methods* 3:785–792.  
803

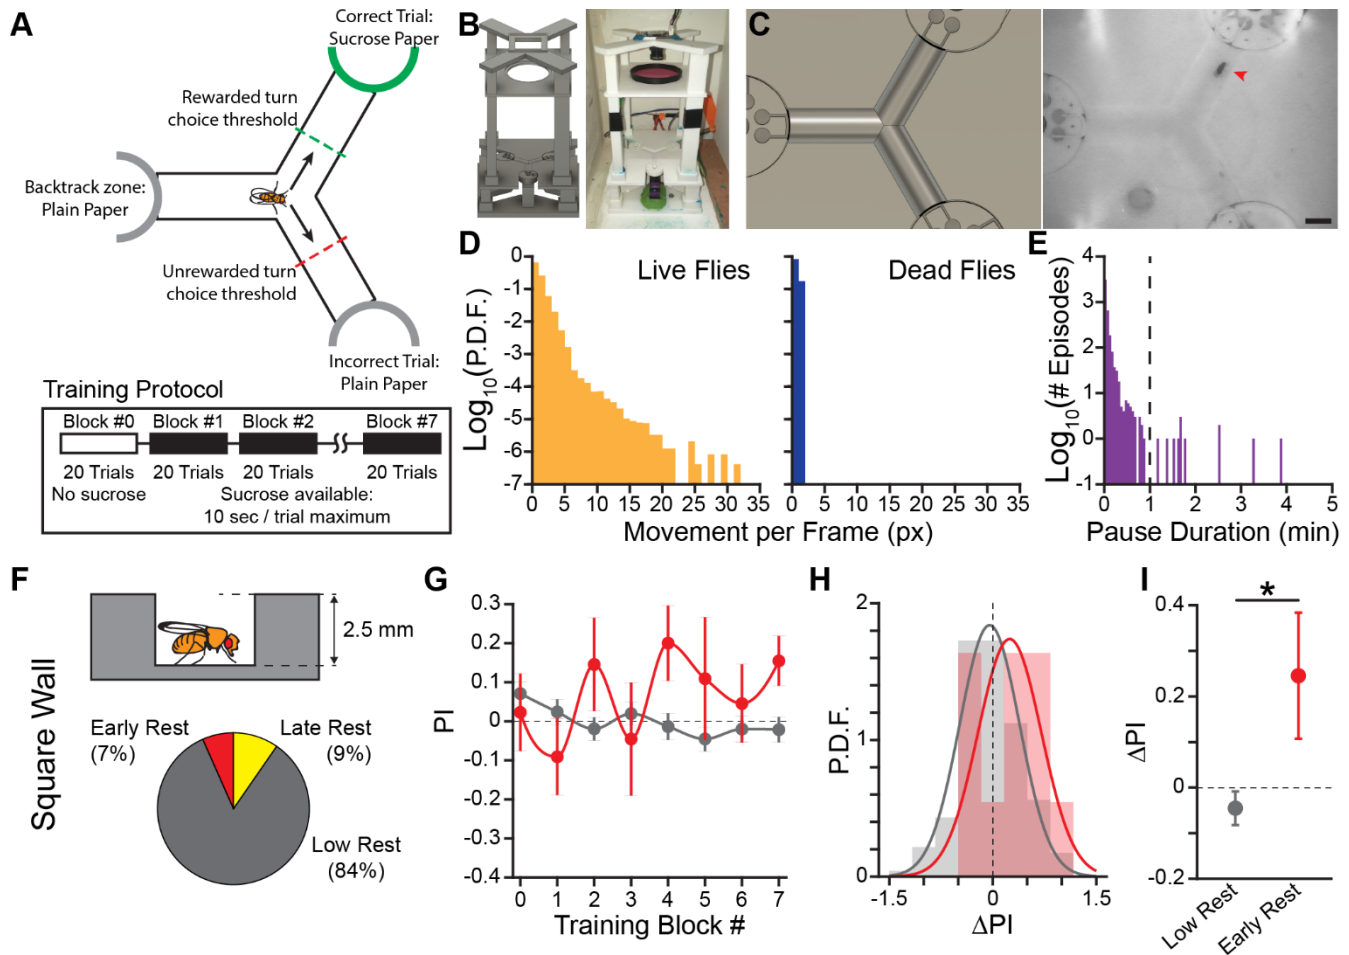

804 **Figure 1 – Flies That Rest Learn the Operant Contingency in a Novel Sucrose**

805 **Seeking Task** (A) Rendering of the 3D model of the novel apparatus used for 3D

806 printing (*Left*) and a photo of a fully assembled apparatus (*Right*). (B) Field of view of

807 overhead camera in the 3D render (*Left*) and a video frame of a fly navigating the Y-

808 Track (*Right*). Red arrowhead indicates the position of the fly. Scale bar: 5 mm. (C)

809 Probability Distribution Function (P.D.F.) histogram of movement per frame (in pixels)

810 for live flies (*Left*) and dead flies (*Right*). One pixel of movement is approximately 90

811  $\mu\text{m}$ . (D) Histogram of locomotor pause durations from 12 hour recordings of locomotor

812 behavior ( $n = 2$  flies, 4127 episodes). Dashed line indicates the 1 minute threshold to

813 distinguish short pauses from rest episodes. (E) Diagram of operant conditioning

814 paradigm. Sucrose is presented at the end of the track in the reinforced direction. A trial  
815 is completed after the fly crosses the choice threshold leaving the center of the track.  
816 Each training block is 20 trials, reward presentation begins in training block #1. Sucrose  
817 is made available for 10 seconds following the fly crossing the choice threshold. (F)  
818 Schematic of hallway geometry with representative fly for scale (*Top*), Fraction of flies  
819 with each rest phenotype (*Bottom*). (G) Mean turn direction Preference Index (PI) for  
820 each training block. Points plotted in color are flies with early rest (drowsy), points  
821 plotted in grey are flies with low rest (restless). (H) Probability Distribution Function  
822 (P.D.F.) histograms of change in turn preference index ( $\Delta$ PI) between training block #1  
823 and #7. The normal distribution fitted to each distribution is superimposed as a line on  
824 the plot. Drowsy flies are plotted in red, restless flies are plotted in grey. (I) Mean  $\Delta$ PI of  
825 low rest (restless) and early rest (drowsy) flies. Error bars are standard error of the  
826 mean, \* significantly different groups.

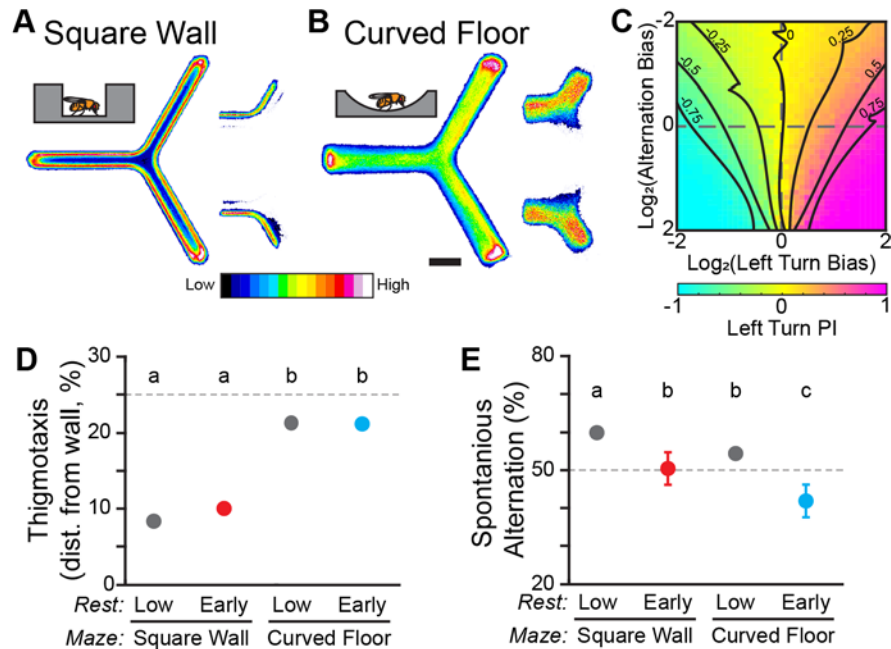

827 **Figure 2 – Y-Track Geometry Significantly Affects Thigmotaxis and Spontaneous**  
 828 **Alternation** (A-B) Position heatmaps of flies in the square wall (A) and curved floor (B)  
 829 Y-Mazes. Insets (*right*) show the heatmaps of trajectories through the center of the  
 830 maze for flies walking from the left zone to the upper zone vs. the lower zone. Scale  
 831 bar: 5 mm. Color shows relative occupancy of each pixel from low to high. (C) Heatmap  
 832 of left turn Preference Index (PI) from a population of *in silico* flies. Each heatmap  
 833 position is the mean of 1000 simulated trials of a fly with a range of left-turn bias and  
 834 alternation bias. Dashed lines indicate zero bias on an axis. Solid lines are smoothed  
 835 contours of constant PI. (D,E) Mean thigmotaxis (D) and spontaneous alternation (E) for  
 836 WT flies in square wall, curved wall, and yolk control experiments. Groups with the  
 837 same letter are not significantly different from one another. (D) Thigmotaxis is defined  
 838 for each fly as the median distance from the wall of walking locations. The dashed line  
 839 indicates the median distance from the wall if walking locations were distributed  
 840 uniformly across the hallway. (E) Spontaneous alternation is measured in the final

841 training block. The dashed line indicates the random rate of alternation. Error bars are  
842 standard error of the mean.



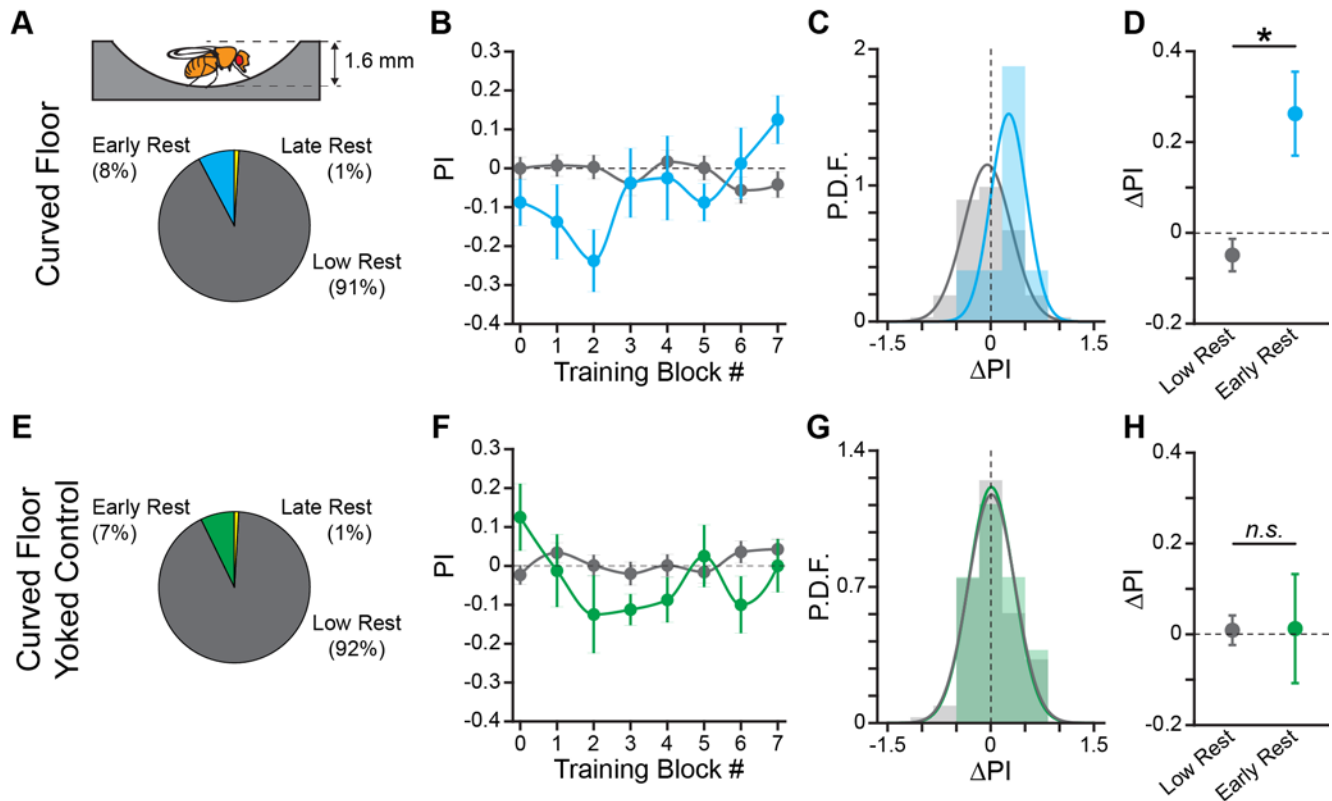

843 **Figure 3 – Learning to Turn Toward Sucrose is Independent of Track Geometry**

844 **but Dependent upon an Informative Operant Contingency** (A) Schematic of hallway

845 geometry with representative fly for scale (*Top*), Fraction of flies with each rest

846 phenotype (*Bottom*). (B, F) Mean turn direction Preference Index (PI) for each training

847 block for trained (B) and yoked control (F) flies in the curved floor Y-Maze. Points

848 plotted in color are flies with early rest (drowsy), points plotted in grey are flies with low

849 rest (restless). (C,G) Probability Distribution Function (P.D.F.) histograms of change in

850 turn preference index ( $\Delta$ PI) between training block #1 and #7 for trained (C) and yoked

851 control (G) flies. The normal distribution fitted to each distribution is superimposed as a

852 line on the plot. Drowsy flies are plotted in color (*cyan*: trained, *green*: yoked), restless

853 flies are plotted in grey. (D,H) Mean  $\Delta$ PI of low rest (restless) and early rest (drowsy)

854 flies trained in curved floor Y-Maze (D), and yoked control flies (H). Error bars are

855 standard error of the mean, *n.s.*: groups are not significantly different, \* significantly  
856 different groups.

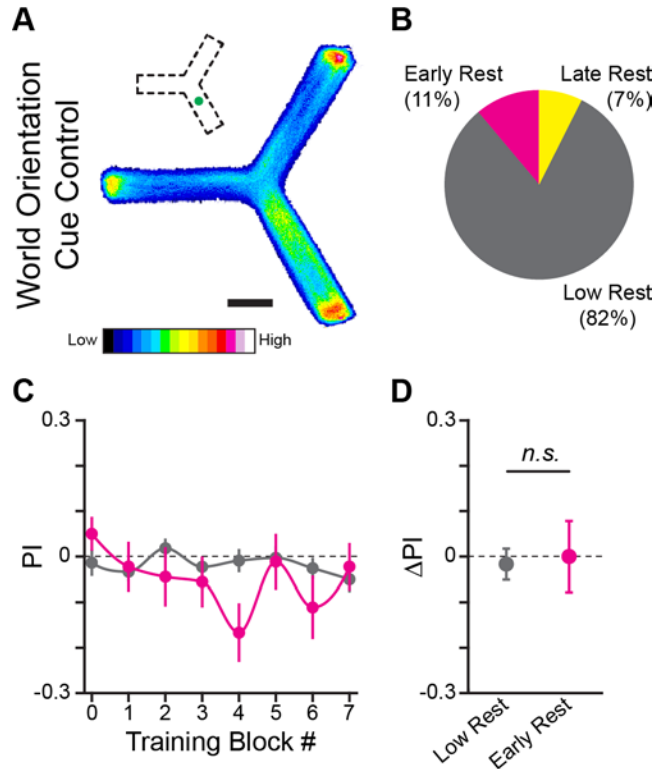

857 **Figure 4 – A World Orientation Cue does not Facilitate Learning the Operant Task.**

858 (A) Position heatmaps of flies trained with an LED spatial orientation cue. Scale bar is 859

859 mm. Color shows relative occupancy of each pixel from low to high. (B) Percentage flies

860 with each rest phenotype. (C) PI by training block for early rest (magenta) and low rest

861 (grey) flies. (D) Mean  $\Delta$ PI of early rest and low rest flies. Error bars are standard error of

862 the mean, *n.s.*: groups are not significantly different.

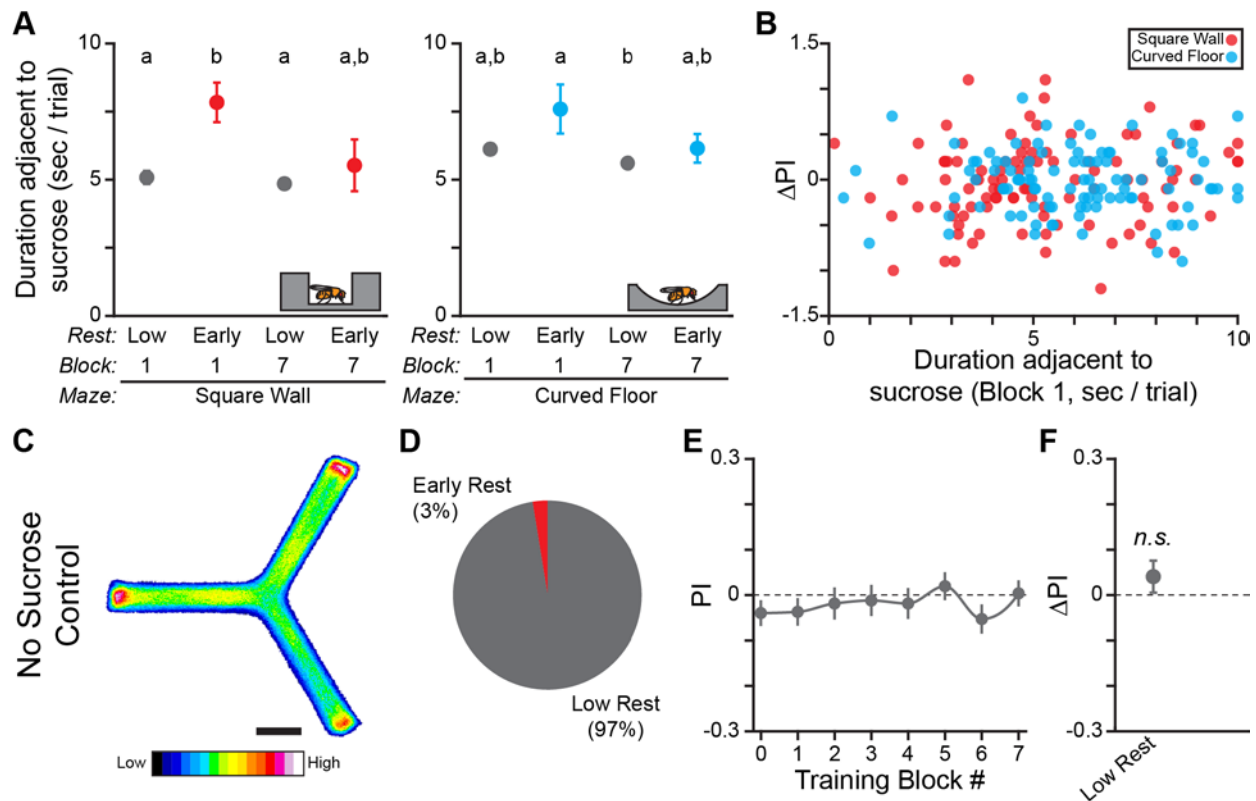

863 **Figure 5 – Sucrose Promotes Rest and is the Only US Attended to by Flies in the**  
 864 **Y-Track.** (A) Mean time per trial WT flies spend adjacent to sucrose in the square wall  
 865 and curved floor experiments. Time per trial is capped at 10 seconds, because sucrose  
 866 is automatically removed 10 seconds after it is made available. Groups with the same  
 867 letter are not significantly different from one another. (B) Scatter plot of change in turn  
 868 preference index ( $\Delta PI$ ) between training block #1 and #7 by time adjacent to sucrose in  
 869 training block #1 for flies in the square wall experiment (red dots) and curved floor  
 870 experiment (cyan dots). (C-F) Results of Y-Maze training with no sucrose available. (C)  
 871 Position heatmaps of trained flies. Scale bar is 5 mm. Color shows relative occupancy  
 872 of each pixel from low to high. (D) Percentage flies with each rest phenotype. PI by  
 873 training block (E) and mean  $\Delta PI$  (F) for low rest flies. Only 2 flies had early rest, which is

874 insufficient to calculate a standard error, so these flies are not plotted. Error bars are  
875 standard error of the mean, *n.s.*: group is not significantly different

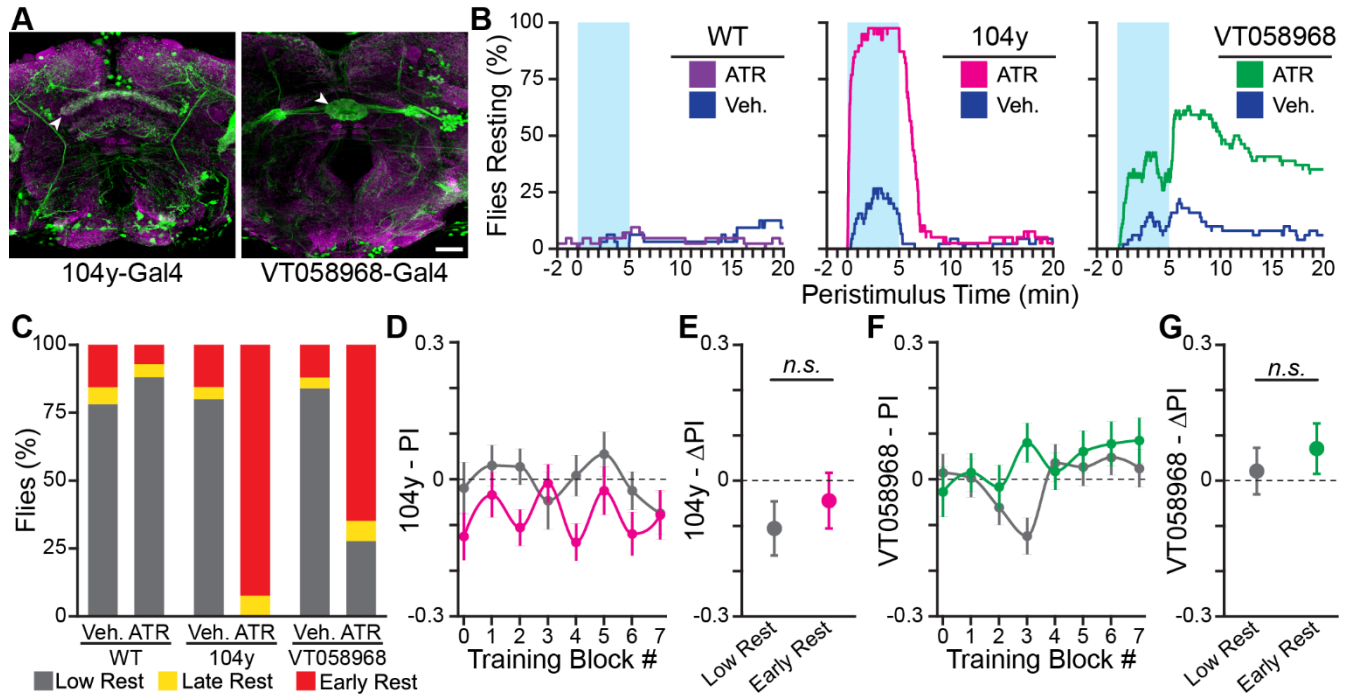

876 **Figure 6 – Optogenetically-Induced Rest is Not Sufficient to Enhance Learning.**

877 (A) Confocal maximum intensity projections of fly brains expressing 104y-Gal4;UAS-GFP (left) and VT058968-Gal4;UAS-GFP (right) stained for GFP (green) and Bruchpilot (nc82, magenta). Scale bar is 20  $\mu$ m. White arrowheads indicate the sleep-promoting neuropil for each Gal4 driver: the dorsal Fan Shaped Body for 104y-Gal4 and the Ellipsoid Body for VT058968-Gal4. (B) Peri-stimulus rest plots for WT (left), 104y (center), and VT058968 (right). Blue shaded area shows when the blue LED is on. The plots show 20 minutes of behavior following light onset - this time is not linked to trial times, which vary between animals, and does not encompass the entire duration of the experiment. (C) Percent of each rest phenotype present in each experiment group. (D-G) Results of training 104y (D,E) and VT058968 (F,G) flies. Early and low rest flies for each genotype were pooled from the ATR and vehicle groups. Turn preference index (PI) (D,F) and change in PI ( $\Delta$ PI) (E,G) are plotted for each genotype. Colorful points

889 are flies with early rest (*magenta*: 104y, *green*: VT058968). Error bars are standard  
890 error of the mean, *n.s.*: groups are not significantly different.

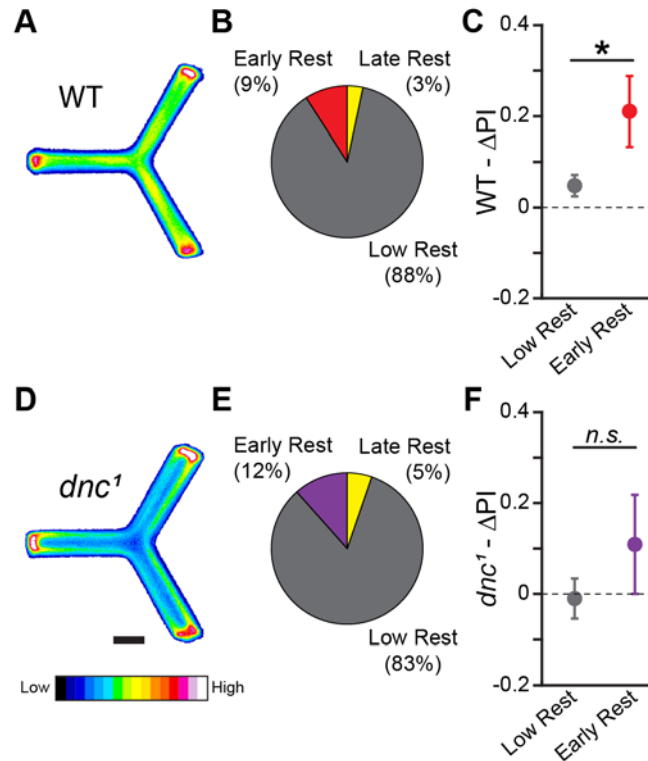

891 **Figure 7 – Y-Track Operant Learning is Dependent on cAMP Regulation. (A,D)**

892 Position heatmaps of trained WT (A) and *dnc*<sup>1</sup> (D) flies. Scale bar is 5 mm. Color shows

893 relative occupancy of each pixel from low to high. (B,E) Fraction of WT (B) and *dnc*<sup>1</sup> (E)

894 flies with each rest phenotype. (C,F) Mean  $\Delta$ PI of low rest (restless) and of early rest

895 (drowsy) WT (C) and *dnc*<sup>1</sup> (F) flies. Error bars are standard error of the mean, n.s.:

896 groups are not significantly different, \* significantly different groups.
